# Supplementary material
Source: PubMed Central journal article supplement (PMC9062971)

**Supplementary Fig. S1.**  
Patient flow chart for the  
histological study.

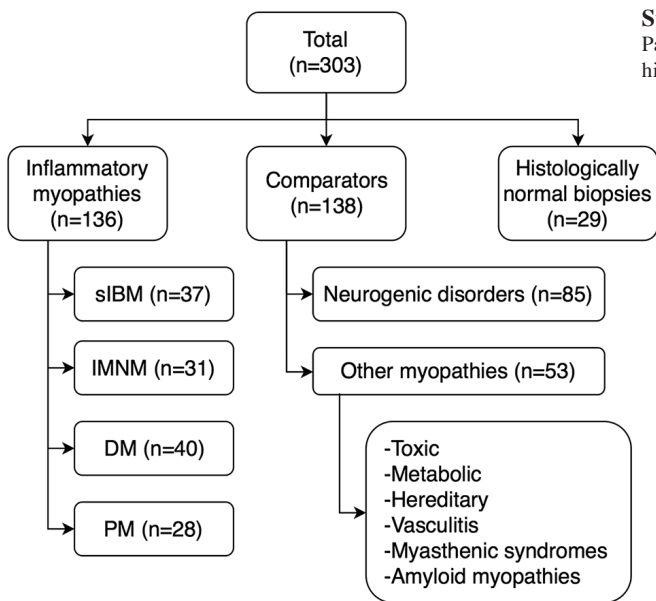

Supplement: NIHMS1797988-supplement-1.pdf [file NIHMS1797988-supplement-1.pdf]
